# Supplementary material
Source: Research Square preprint supplement (doi:10.21203/rs.3.rs-7161428/v1)
Supplement: Supplementary file 1 [file 011dcb769ffe384f15ca74f7.docx]

**Additional File 1**. ROC comparison among each model


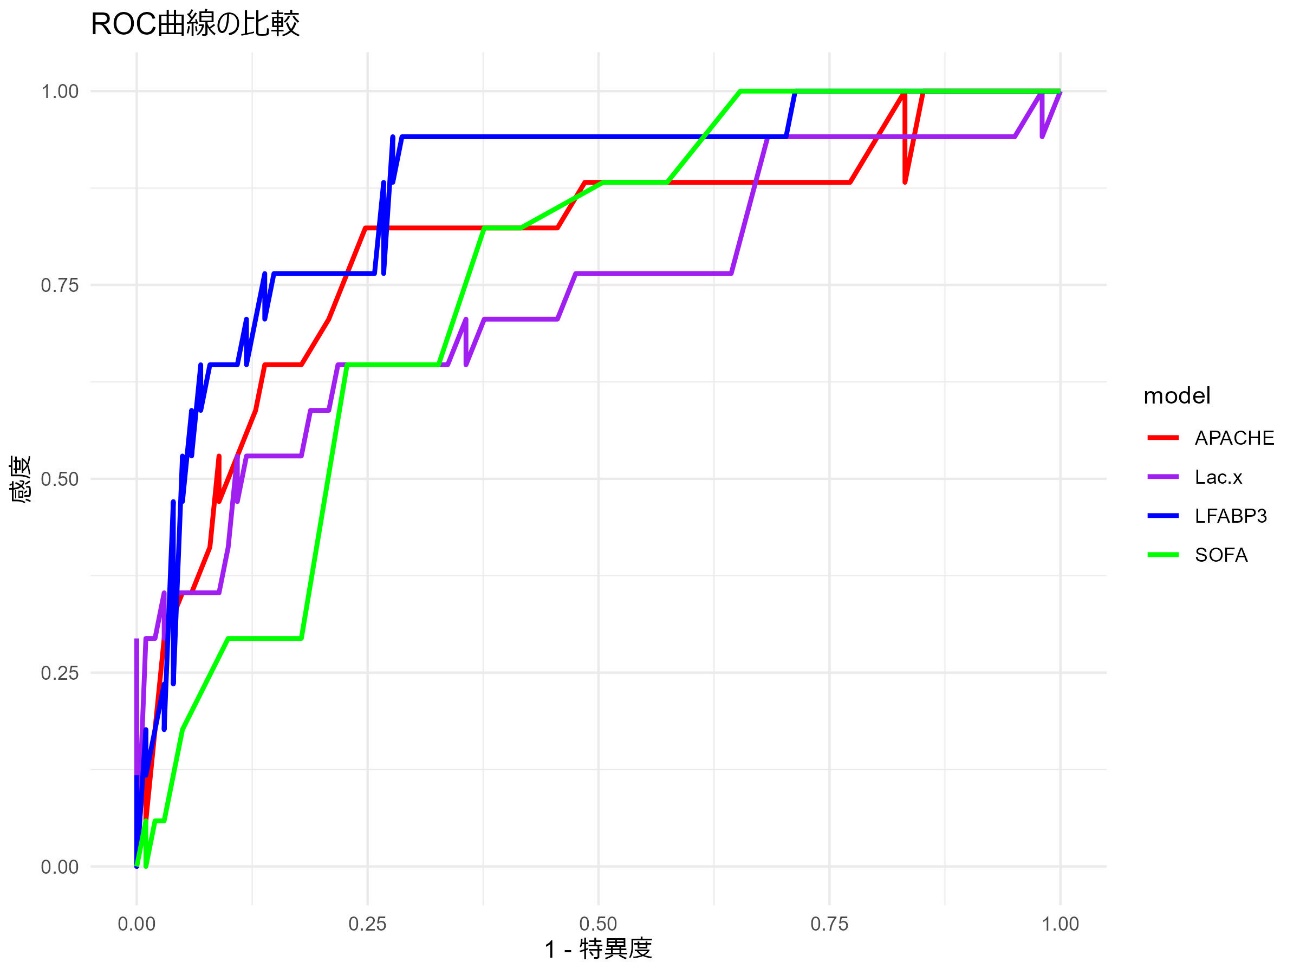


L-FABP(T3)

APACHEⅡ

SOFA

Lac

Sensitivity

Specificity
