# Supplementary material
Source: Research Square preprint supplement (doi:10.21203/rs.3.rs-7161428/v1)
Supplement: Supplementary file 2 [file 8c530f1b2f4825e6ff68ce8d.docx]

**Additional File 2**. ROC curve of L-FABP ratio (T3/T0) for 28-day mortality prediction
